# Supplementary material for: Tuning microtubule dynamics to enhance cancer therapy by modulating FER-mediated CRMP2 phosphorylation
Source: PubMed Central journal article supplement (PMC5797184; doi:10.1038/s41467-017-02811-7), 2018-02-02
Supplement: 41467_2017_2811_MOESM1_ESM.pdf [file 41467_2017_2811_MOESM1_ESM.pdf]

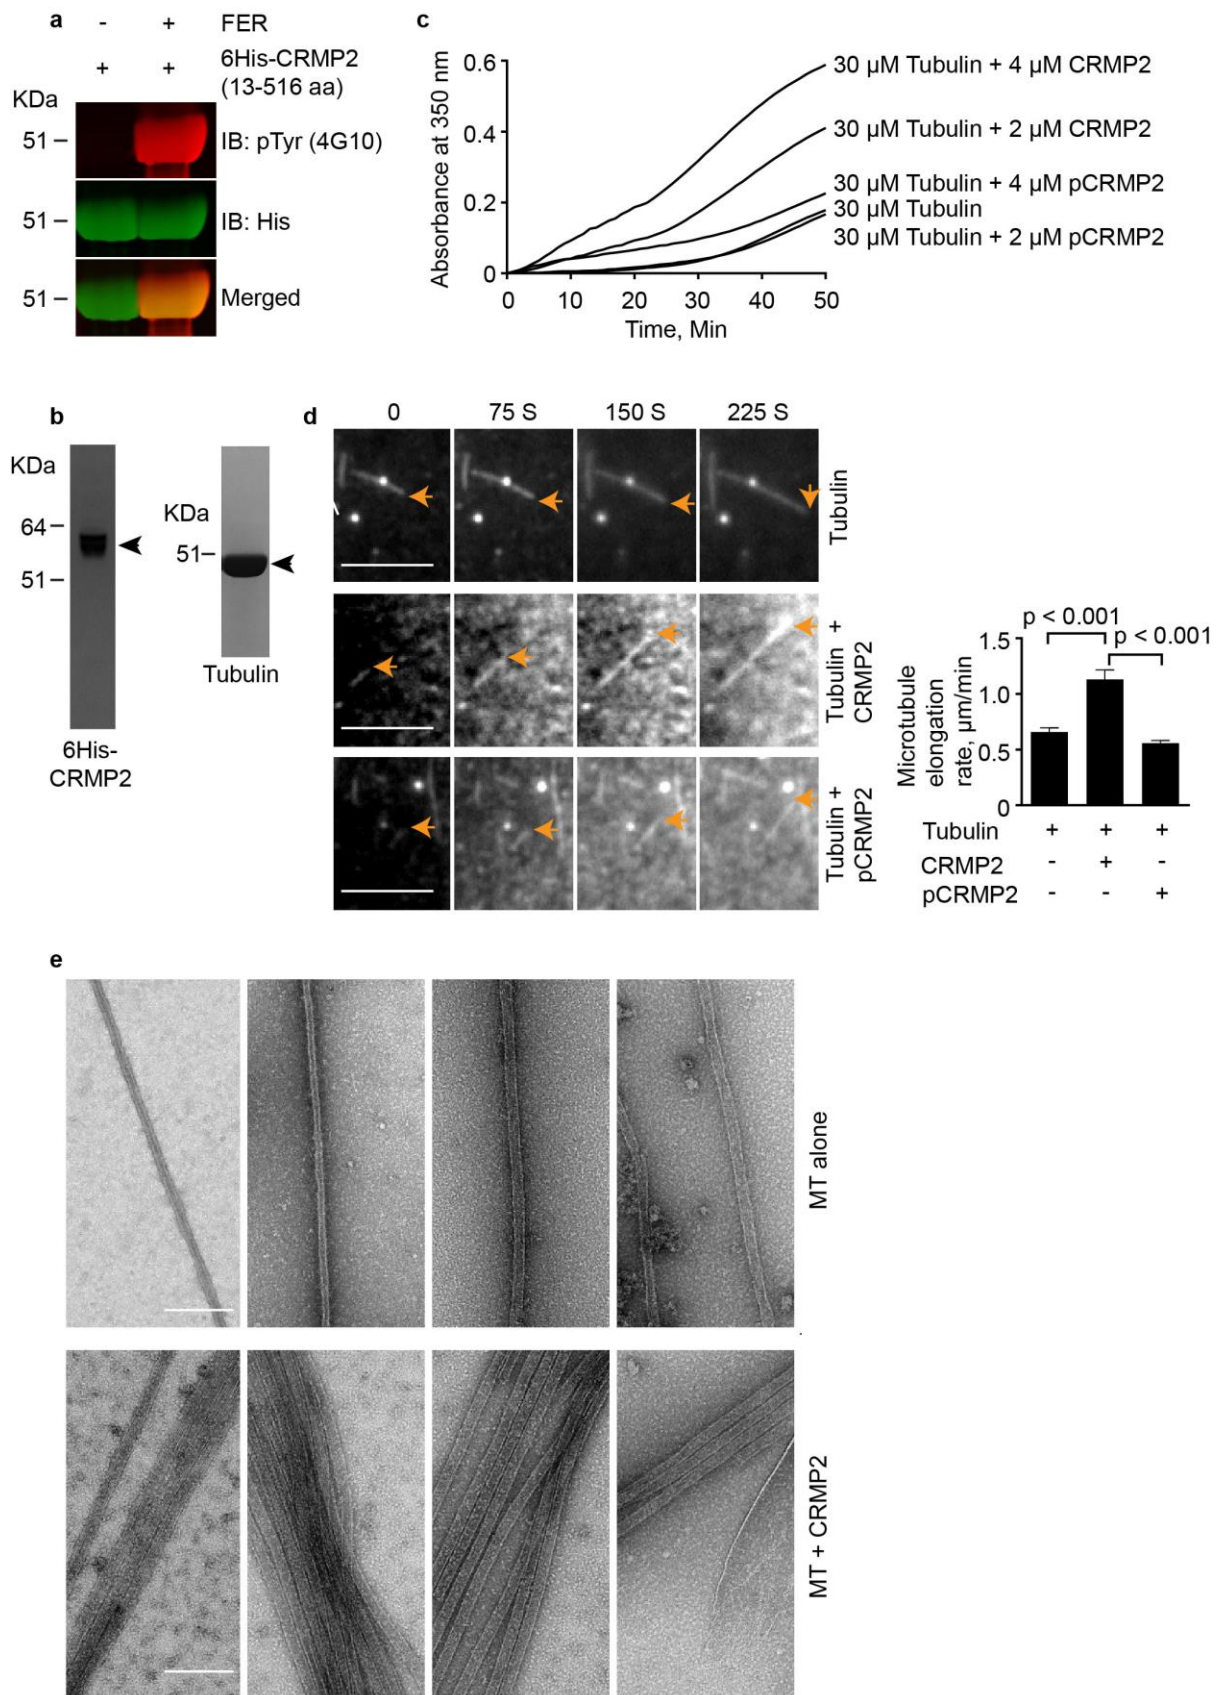

**Supplementary Figure 1.** (a) Recombinant 6His-CRMP2 (residues 13-516) was purified and used for *in vitro* kinase assays in the absence or presence of active GST-FER protein

(residues 521-822). The samples were analyzed by SDS-PAGE, and immunoblotted with the indicated antibody. **(b)** SDS-PAGE and coomassie staining for recombinant 6His-CRMP2, and tubulin which was purified from pig brains. **(c)** Tubulin polymerization was measured by absorbance at 350 nm in the absence or presence of CRMP2 or pCRMP2 (phosphorylated by FER kinase). **(d)** Time lapse of microtubule elongation using total internal reflection fluorescence microscopy (TIRFM). 400 nM GMPCPP-microtubule seeds were incorporated with 10% of rhodamine-labeled microtubules and attached onto glass coverslips that were pre-incubated with anti- $\alpha$ -tubulin antibody. 7.5  $\mu$ M 50% rhodamine-labeled tubulin was injected into the reaction chamber to initiate microtubule elongation in the absence or presence of CRMP2 or pCRMP2 (phosphorylated by FER kinase). Images were obtained at the indicated time points. The orange arrowheads point to the leading edge of a single microtubule. Bar plots are shown as mean + s.e.m. of microtubule elongation rate, from at least 25 individual microtubules, shown are typical results from at least three independent replicates. Scale bar is 5  $\mu$ m. See also Supplementary movie 1-3. **(e)** More examples of electron microscopy images of microtubules in the absence or presence of recombinant 6His-CRMP2. Scale bar is 200 nm.

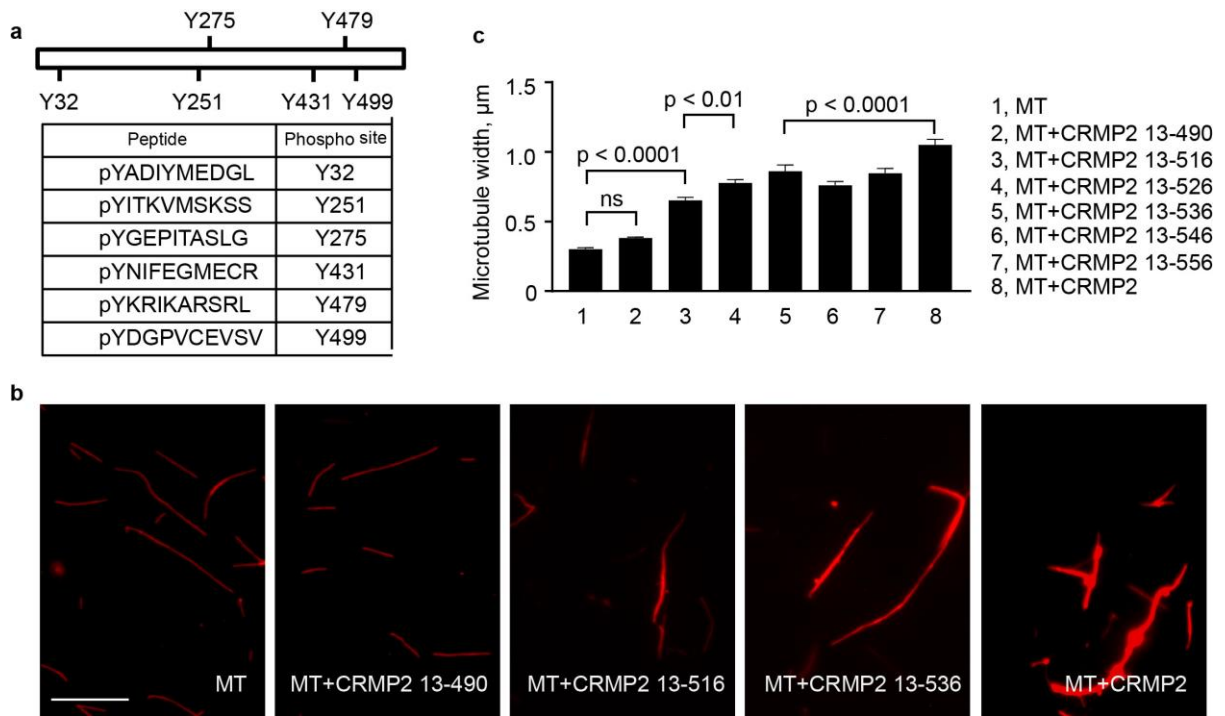

**Supplementary Figure 2.** (a) A schematic showing the phosphorylation sites of CRMP2, mediated by FER kinase, that were revealed by Mass Spectrum phospho-mapping. (b) The indicated recombinant CRMP2 wild-type or truncated CRMP2 proteins were incubated with paclitaxel-stabilized rhodamine-labeled microtubules for 40 minutes at room temperature. Shown are typical results from at least three independent replicates. Scale bar is 10  $\mu\text{m}$ . (c) Bar plots represent the mean + s.e.m. of microtubule width, from at least 150 individual microtubules per condition tested.

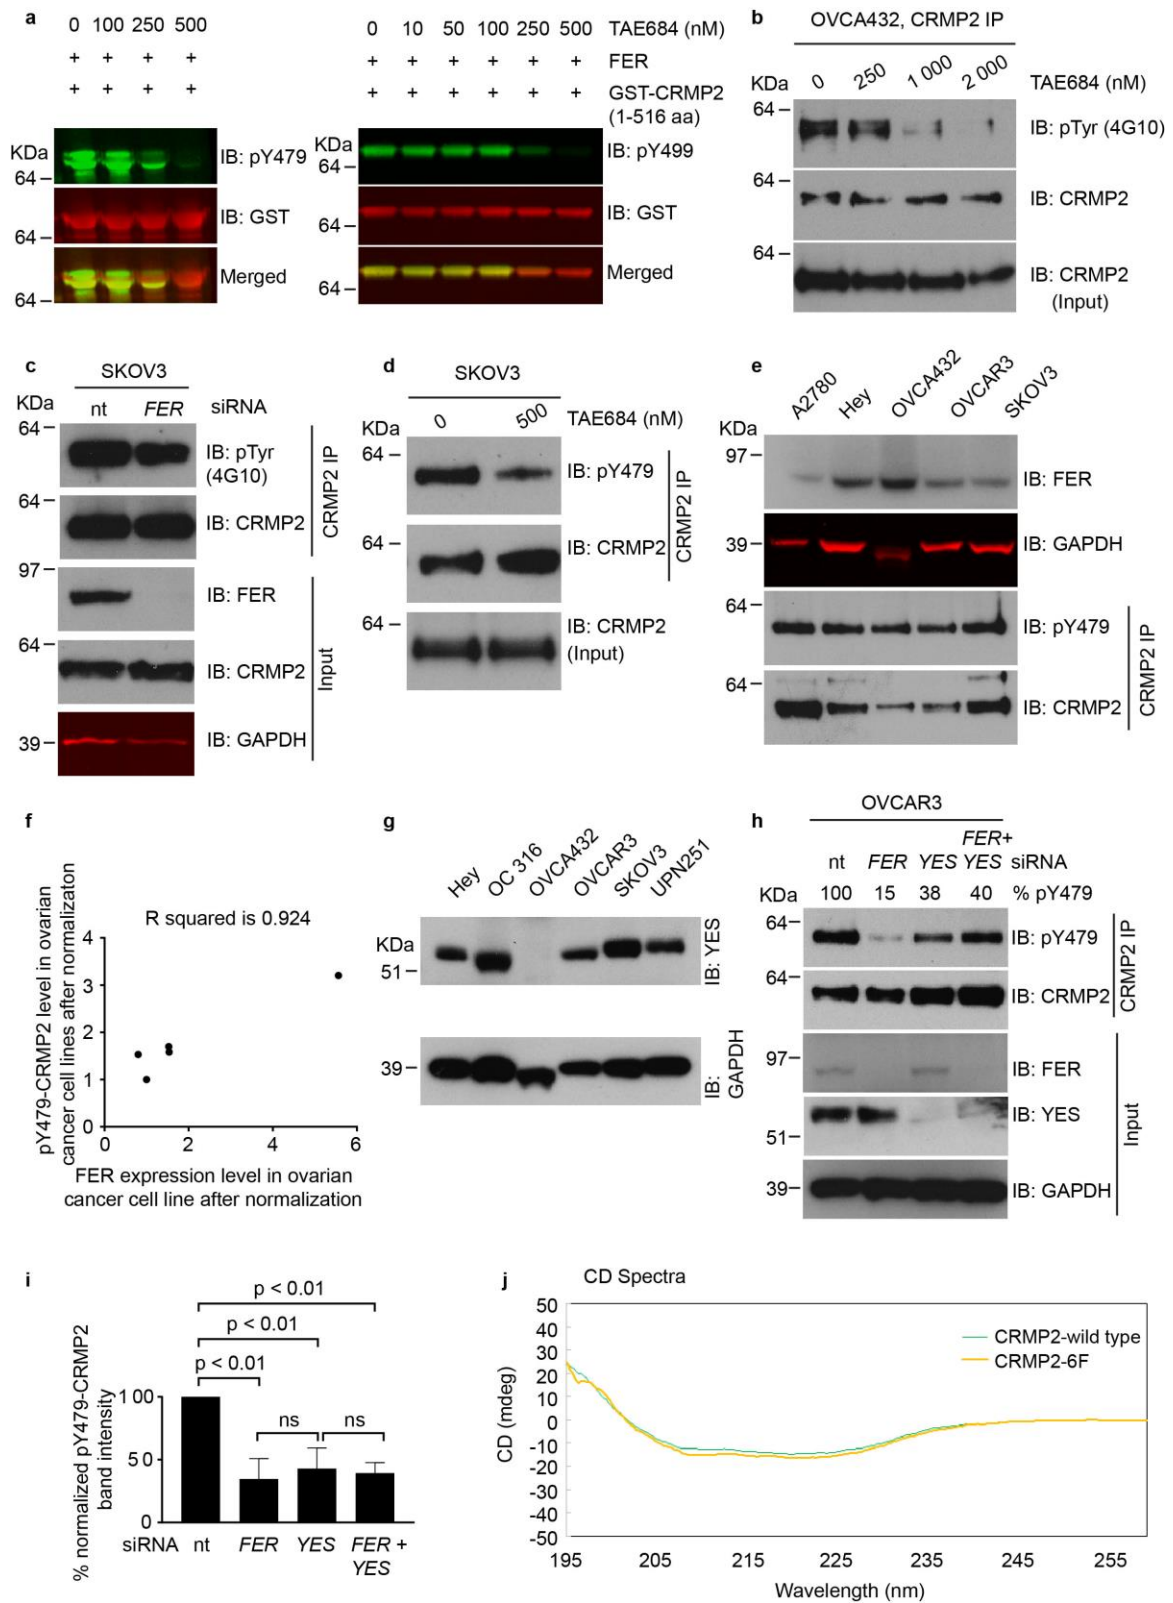

**Supplementary Figure 3. (a)** Recombinant GST-CRMP2 (residues 1-516) was purified and used for *in vitro* kinase assays in the absence or presence of active GST-FER protein (residues 521-822), and incubated with increasing concentrations of the FER inhibitor

TAE684. The samples were analyzed by SDS-PAGE, and immunoblotted using the indicated antibodies. **(b)** Lysates of OVCA432 cells, which were treated with increasing concentrations of TAE684, were immunoprecipitated with anti-CRMP2 antibody. The samples were analyzed by SDS-PAGE, and immunoblotted with the indicated antibodies. 4G10 is a general anti-phosphotyrosine antibody. CRMP2 was loaded as a control for protein input. IB, immunoblot. **(c)** Lysates of SKOV3 cells, which were treated with non-targeting (nt) siRNA or *FER* siRNA, were immunoprecipitated with anti-CRMP2 antibody. The samples were analyzed by SDS-PAGE, and immunoblotted with the indicated antibodies. CRMP2 was loaded as a control for protein input. Also shown are immunoblots that confirm the depletion of *FER*. **(d)** Lysates of SKOV3 cells, which were treated with or without 500 nM TAE684, were immunoprecipitated with anti-CRMP2 antibody. The samples were analyzed by SDS-PAGE, and immunoblotted with the indicated antibodies. **(e)** Lysates of the indicated ovarian cancer cell lines were immunoprecipitated using an anti-CRMP2 antibody. The samples were analyzed by SDS-PAGE, and immunoblotted with the indicated antibodies. Shown are typical results from three independent replicates. **(f)** Correlation analysis of pY479-CRMP2 and *FER* protein expression level in multiple ovarian cancer cell lines, including A2780, Hey, OVCA432, OVCAR3, and SKOV3 cell lines. pY479-CRMP2 level was determined by  $(\text{pY479-CRMP2}) / (\text{total CRMP2})$  in individual cell lines. **(g)** Western immunoblot (IB) analysis for YES kinase expression in multiple ovarian cancer cell lines using the indicated antibodies. **(h)** Lysates of the ovarian cancer cell line OVCAR3, which was treated with the indicated siRNA, were immunoprecipitated with anti-CRMP2 antibody. The samples were analyzed by SDS-PAGE, and immunoblotted with the indicated antibodies; nt siRNA was non-targeting siRNA. Shown are typical results from three independent replicates. **(i)** Quantification analysis of pY479-CRMP2 in OVCAR3 cells treated with the indicated siRNAs. Bar plots represent the mean + s.e.m. of pY479-CRMP2 level from three replicates. **(j)** CD Spectra comparison of full-length CRMP2 wild-type and CRMP2-6F: Spectra are similar indicating similar secondary structures.

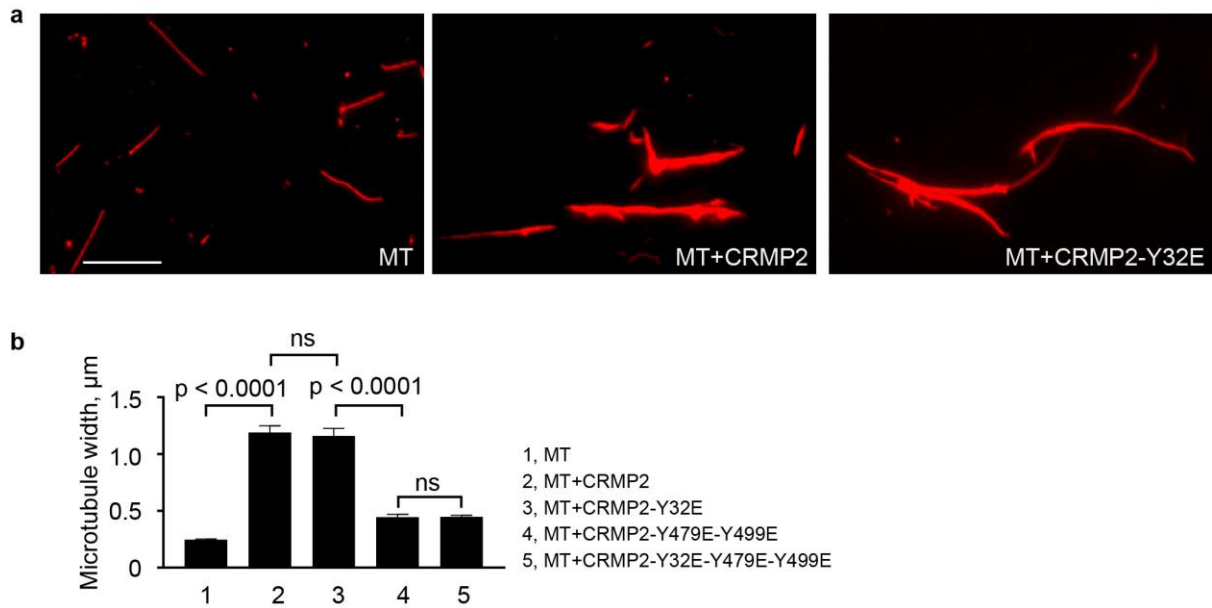

**Supplementary Figure 4.** (a) The indicated recombinant CRMP2 wild-type or CRMP2-Y32E mutant proteins were incubated with paclitaxel-stabilized rhodamine-labeled microtubules for 40 minutes at room temperature. Shown are typical results from at least three independent replicates. Scale bar is 10  $\mu\text{m}$ . (b) Bar plots represent the mean + s.e.m. of microtubule width, from at least 150 individual microtubules per condition tested.

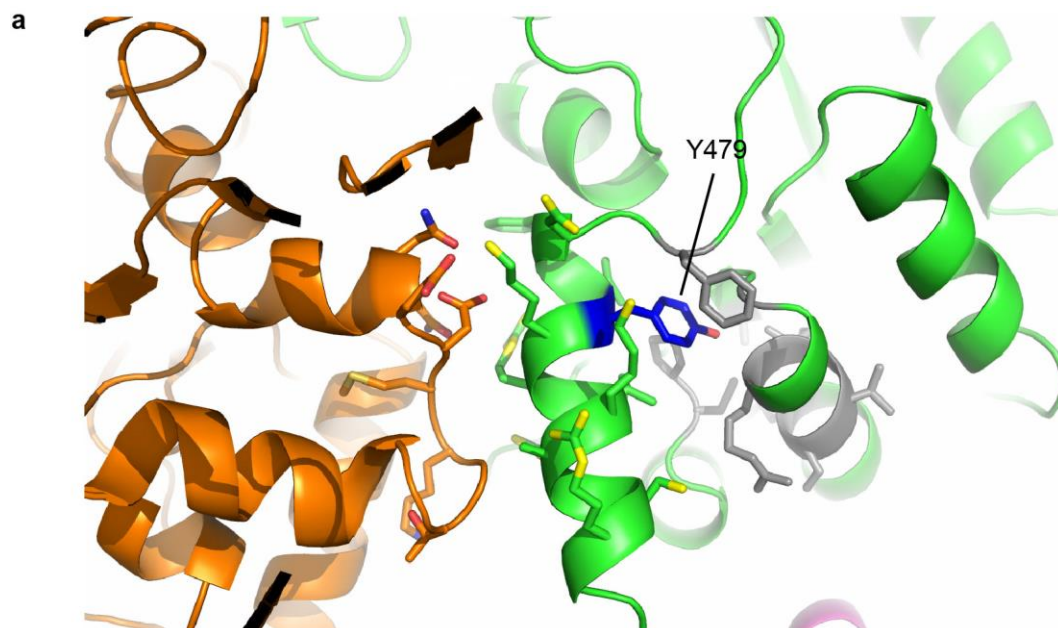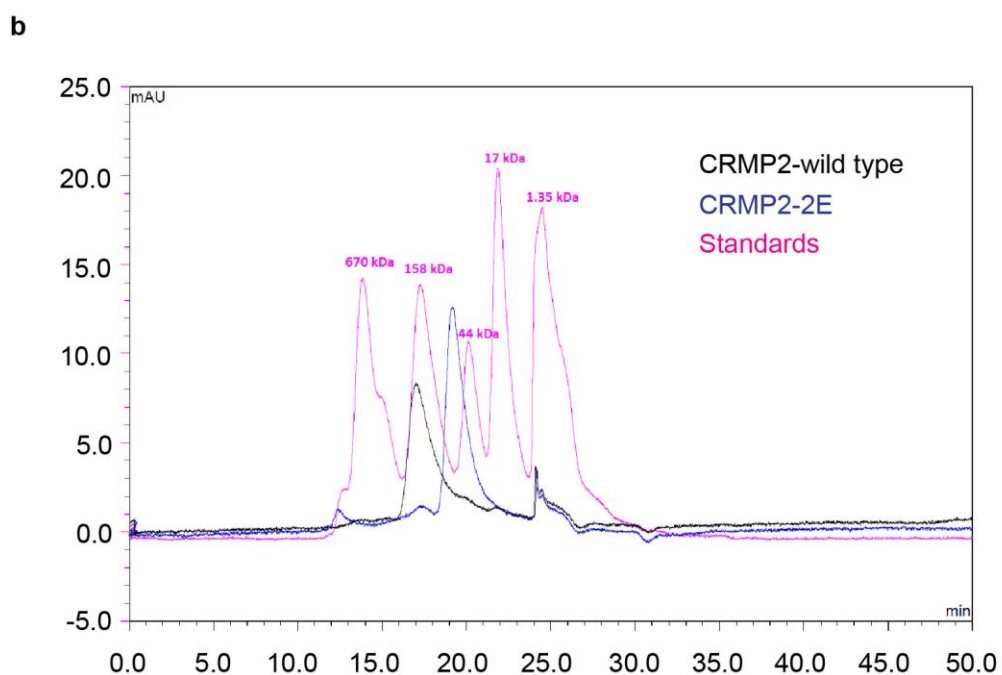

**Supplementary Figure 5. (a)** The hydrophobic pocket around Y479 (blue) is shown. The residues at tetramerization interface are shown as sticks in green (for Chain A) and orange (for Chain B). The residues in the hydrophobic pocket are shown in grey. **(b)** Analytical Gel Filtration profiles of CRMP2 wild-type (residues 13-516) and CRMP2-2E (residues 13-516). CRMP2 wild-type (shown in black) shows an elution peak around 200 kDa, corresponding to a tetramer. Phosphomimetic mutant CRMP2-2E, on the other hand, shows an elution peak around 100 kDa, corresponding to a dimer.

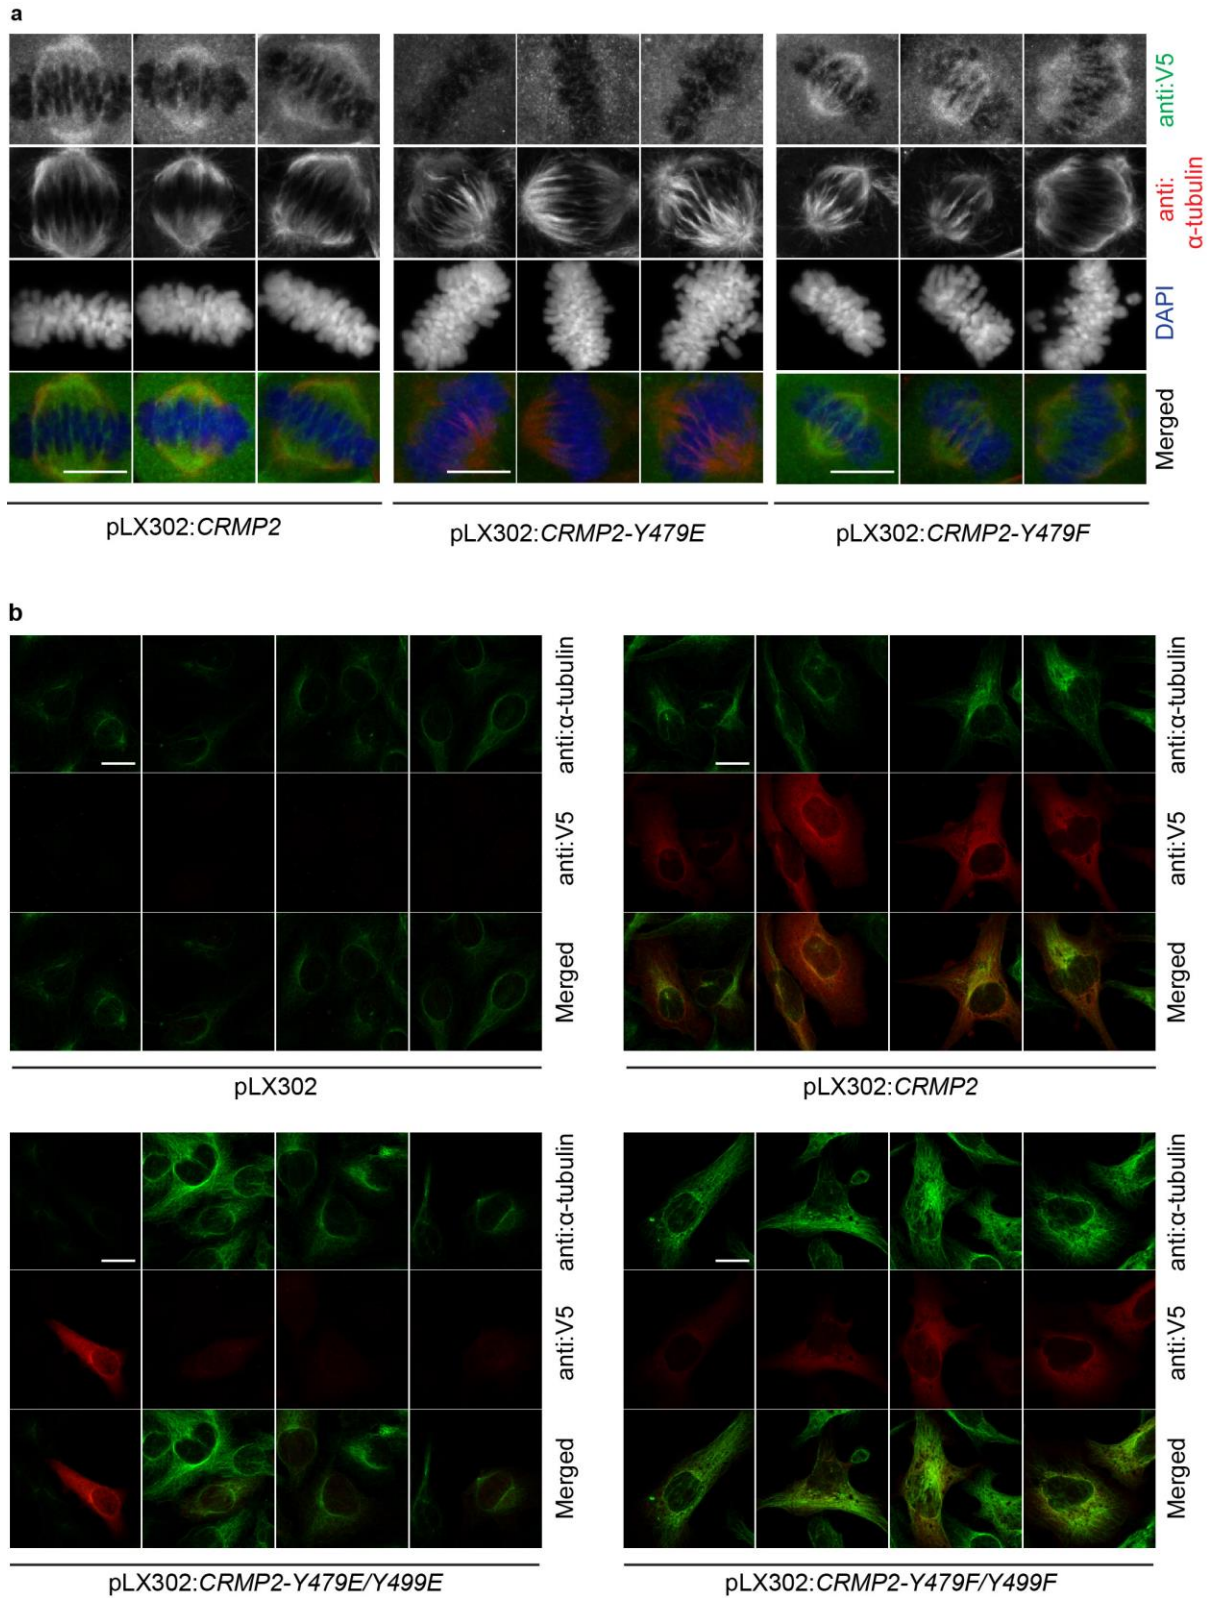

**Supplementary Figure 6.** (a) More examples of immunofluorescence staining for OVCA432 mitotic cells which were transduced with pLX302:CRMP2, pLX302:CRMP2-Y479E, or pLX302:CRMP2-Y479F plasmids. CRMP2, CRMP2-Y479E, or CRMP2-Y479F were detected by anti-V5 antibody. Mitotic microtubules were detected using an anti- $\alpha$ -tubulin



antibody. The nucleus was revealed using DAPI. Scale bar is 10  $\mu\text{m}$ . **(b)** More examples of immunofluorescence staining for SKOV3 cells, which were transiently transduced with pLX302, pLX302:CRMP2, pLX302:CRMP2-Y479E/Y499E, or pLX302:CRMP2-Y479F/Y499F plasmids. 48 hours following transduction the cells were incubated on ice for 25 minutes before fixation and staining using the indicated antibodies to reveal microtubules (anti- $\alpha$ -tubulin antibody) and CRMP2 (anti-V5 antibody). Scale bar is 20  $\mu\text{m}$ .

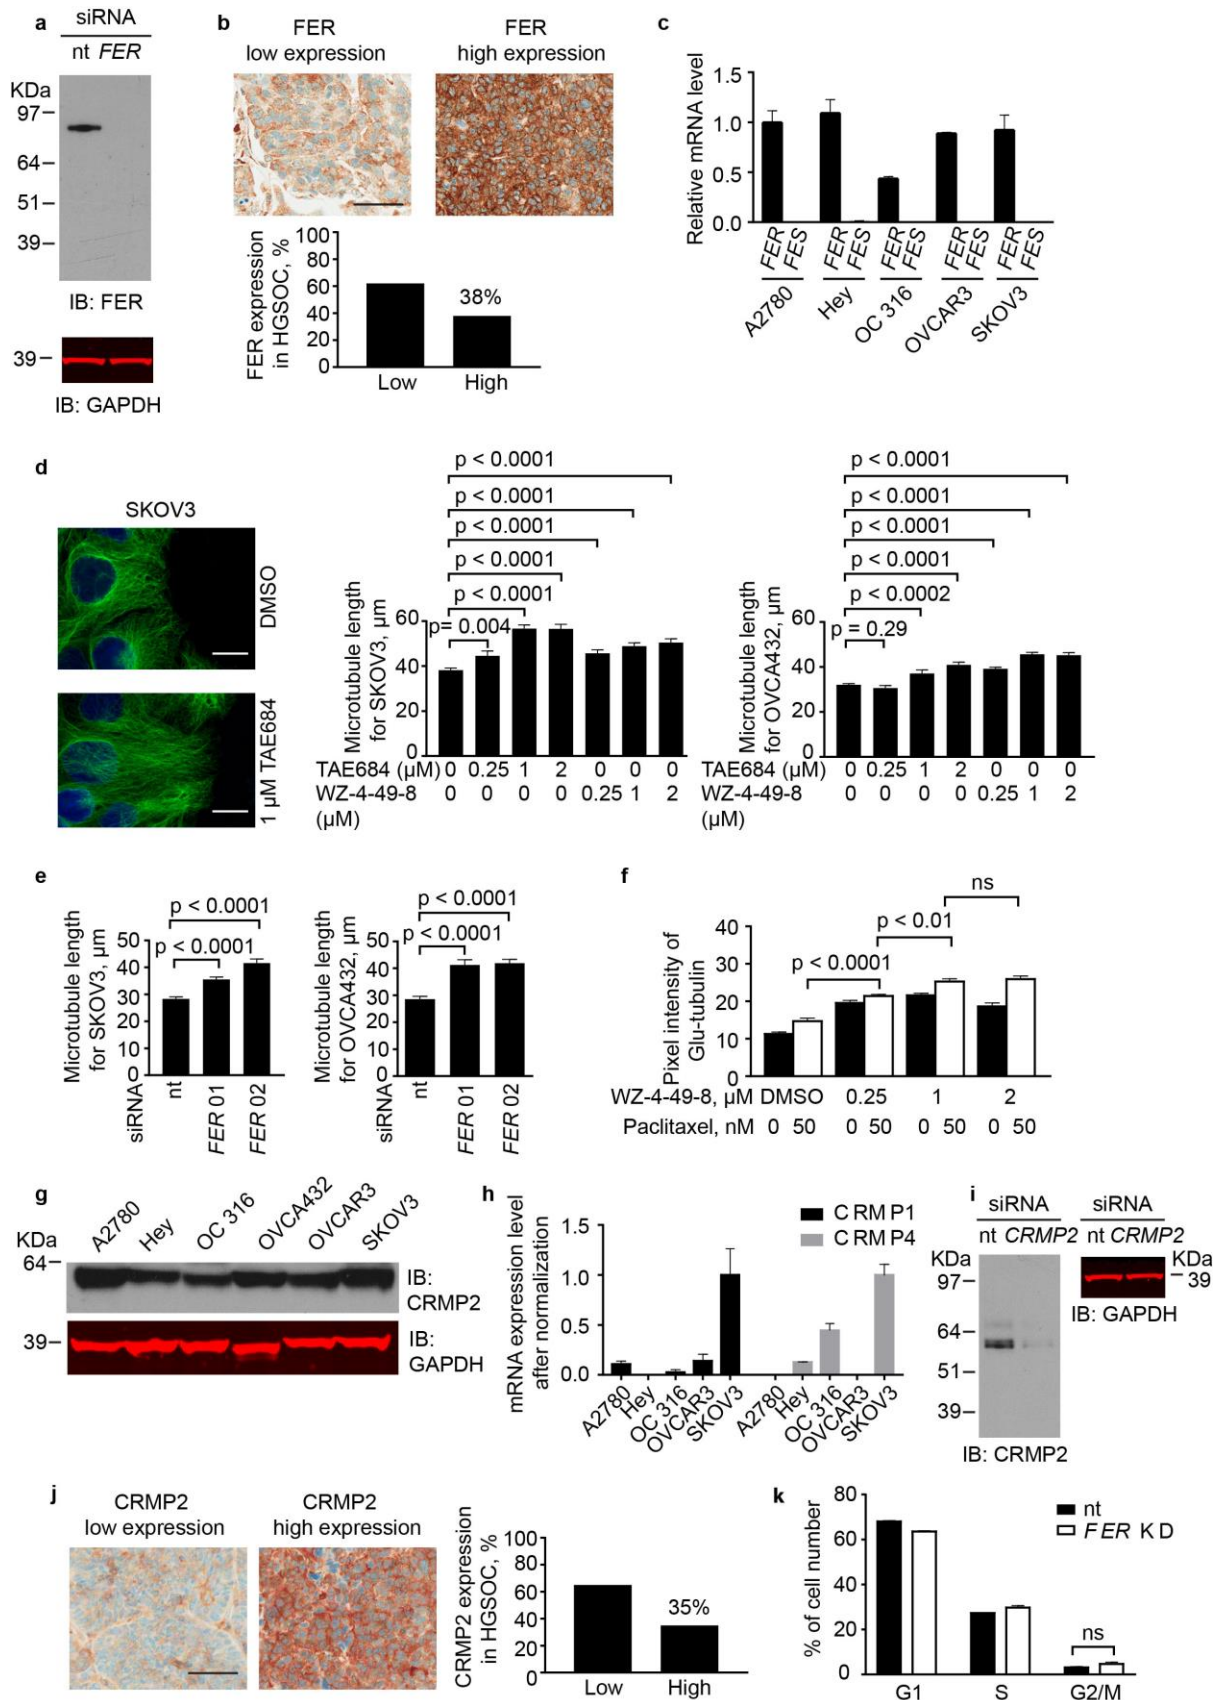

**Supplementary Figure 7.** (a) SKOV3 cells were depleted of FER using siRNA. The samples were analyzed by SDS-PAGE, and immunoblotted with the indicated antibody to

test whether this antibody detected a single band and was, therefore, suitable for estimation of FER levels using immunohistochemistry. **(b)** Representative images of FER staining in high grade serous ovarian cancer (HGSOC). Bars represent the fraction of HGSOCs that express low or high FER as indicated. **(c)** qPCR analysis for FER or FES in multiple ovarian cancer cell lines. Bar plots represent the mean + s.e.m. of relative mRNA level. **(d)** Immunofluorescence staining to measure microtubule length in SKOV3 or OVCA432 cells using anti- $\alpha$ -tubulin antibody. Cells were treated with increasing concentrations of FER kinase inhibitors TAE684 or WZ-4-49-8 overnight. A scratch was then performed to align the microtubules in the direction of the scratch to facilitate the measurement of the microtubule length. Cells were fixed 6 hours after scratching. Bar plots represent the mean + s.e.m. of the measured microtubule length, from at least 200 cells per condition tested. Shown are typical results from at least three independent replicates. Scale bar is 10  $\mu$ m. **(e)** Immunofluorescence staining to measure microtubule length in SKOV3 or OVCA432 cells using anti- $\alpha$ -tubulin antibody. Cells were transfected with non-targeting (nt) siRNA, *FER* siRNA 01, or *FER* siRNA 02. Then, cell scratching and staining were performed as shown in **(d)**. Bar plots represent the mean + s.e.m., from at least 200 cells per condition tested. Shown are typical results from at least three independent replicates. **(f)** Immunofluorescence staining for Glu-tubulin in SKOV3 cells, which were treated with increasing concentrations of WZ-4-49-8 overnight. Cells were treated with 50 nM paclitaxel or DMSO for 4 hours before fixation and staining. Bar plots represent mean + s.e.m. of pixel fluorescence intensity values, from at least 100 cells per condition tested, shown are typical results from at least three independent replicates. Scale bar is 10  $\mu$ m. **(g)** Western blot analysis for CRMP2 expression in multiple ovarian cancer cell lines. Total lysates were analyzed by SDS-PAGE and immunoblotted using the indicated antibody. **(h)** qPCR analysis for CRMP1 or CRMP4 in multiple ovarian cancer cell lines. Bar plots represent the mean + s.e.m. of relative mRNA level. **(i)** SKOV3 cells were depleted of CRMP2 using siRNA. The samples were analyzed by SDS-PAGE, and immunoblotted with anti-CRMP2 antibody to test whether this antibody detected a predominantly single band that reduced following siRNA depletion and was, therefore, suitable for estimation of CRMP2 level using immunohistochemistry. **(j)** Representative images of CRMP2 staining in high grade serous ovarian cancer (HGSOC). Bars represent the fraction of HGSOCs by magnitude of expression of CRMP2. **(k)** SKOV3 cells were treated with non-targeting (nt) siRNA or *FER* siRNA and 96 hours later, cell cycle analysis was performed using flow cytometry. Bar plots represent the mean + s.e.m. of relative cell number ( $n = 3$ ).

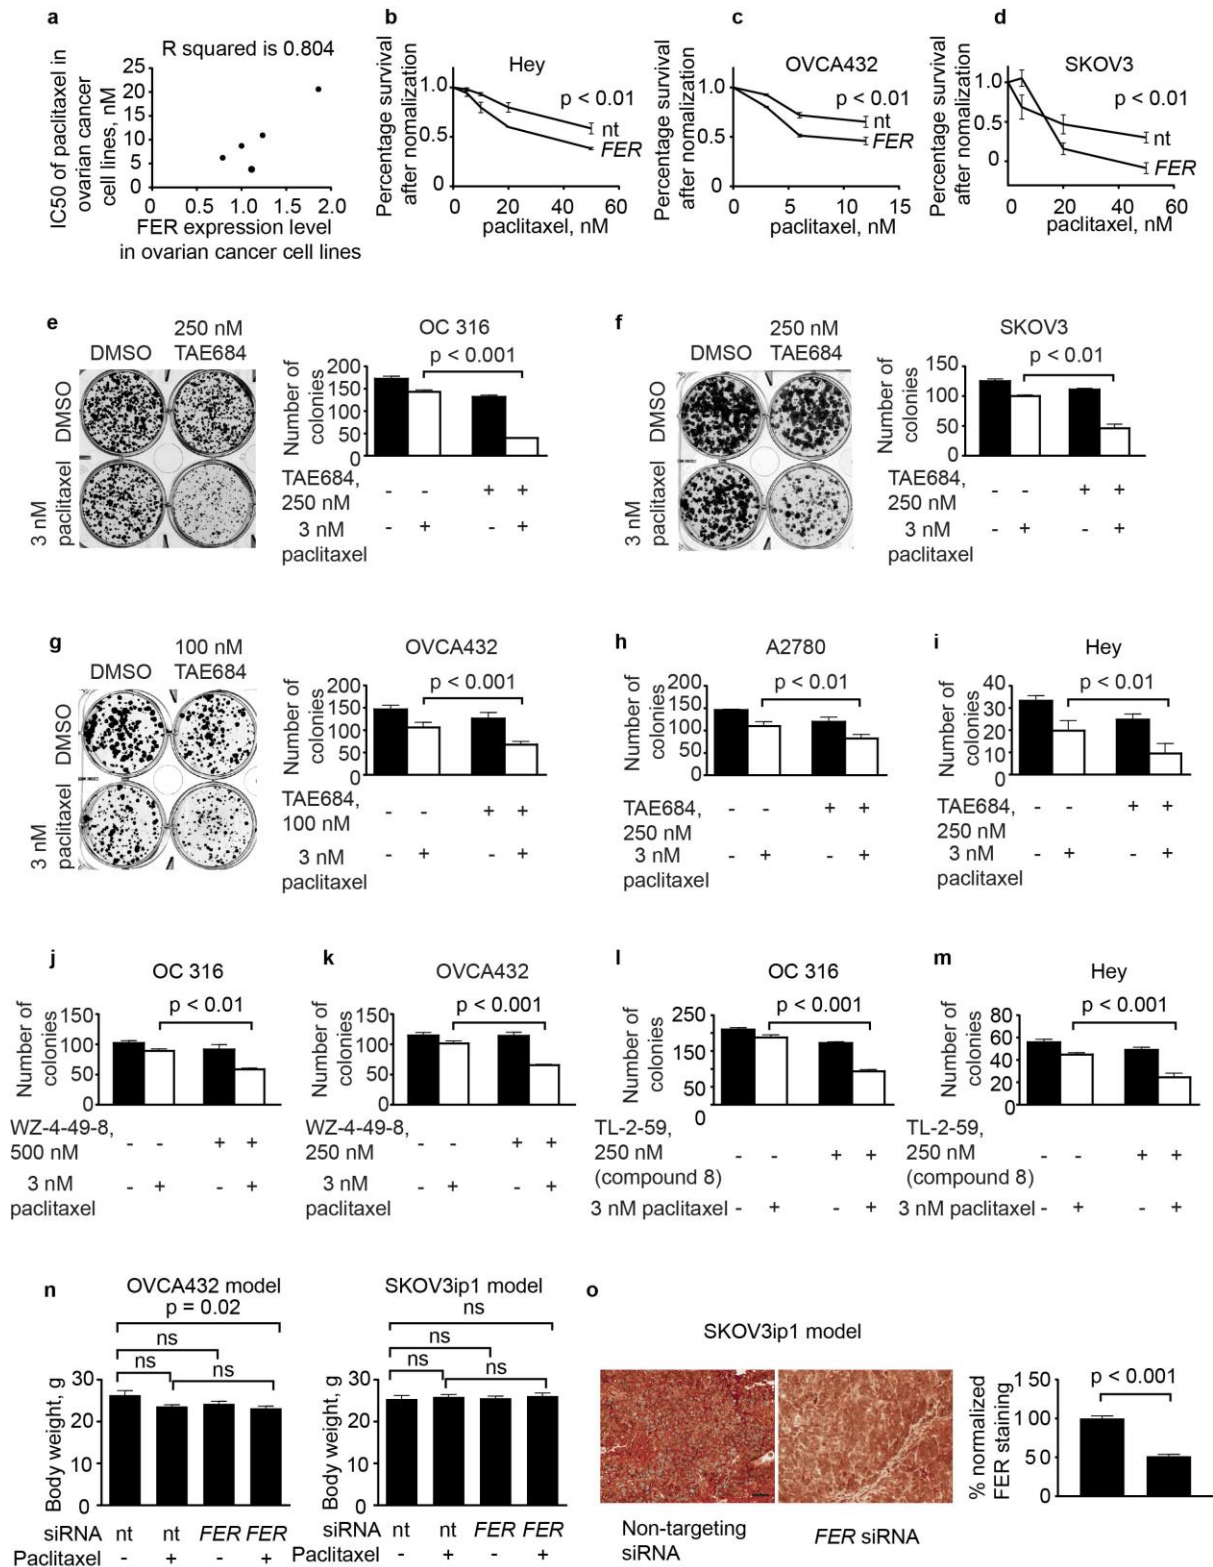

**Supplementary Figure 8.** (a) Correlation between FER protein expression level and the IC50 value of paclitaxel in multiple ovarian cancer cell lines. FER expression level was investigated at protein levels by direct blotting using anti-FER antibody. 3000 cells of the individual ovarian cancer cell lines (including A2780, Hey, OC 316, OVCAR3, and SKOV3) were plated into 96-well plates, and treated with increasing concentrations of paclitaxel after

24 hours. The cells were fixed and stained using crystal violet to estimate the number of cells 72 hours after paclitaxel treatment using OD measurements. IC<sub>50</sub> value was produced for individual ovarian cancer cell lines using Prism 7 software. **(b-d)** 5000 cells of the indicated ovarian cancer cell lines were plated into individual wells of 96-well plates and transfected using non-targeting (nt) siRNAs or *FER* siRNAs. 48 hours later, the cells were treated with paclitaxel at the indicated concentrations. The cells were fixed and stained using crystal violet to estimate the number of cells 48 hours after paclitaxel treatment using OD measurements. Shown is the mean  $\pm$  s.e.m. of normalized OD values from at least three independent experiments. **(e-i)** 500 cells of the indicated ovarian cancer cell lines were plated into individual wells of 6-well plates, and treated with either the FER inhibitor TAE684 at the indicated concentrations or diluent (DMSO). Two days later, cells were treated with 3 nM paclitaxel or diluent for 5 days before fixation and staining. Representative images of stained colonies are presented in **e-g**. Bar plots represent the mean + s.e.m. of the number of colonies from at least three independent experiments. **(j-k)** 500 cells of the indicated cells lines were plated into individual wells of 6-well plates, and were treated overnight with either the FER inhibitor WZ-4-49-8 or diluent (DMSO) then cells were treated with either 3 nM paclitaxel or diluent for 5 days before fixation and staining using coomassie blue. Bar plots represent the mean + s.e.m. of the number of colonies from at least three independent experiments. **(i-m)** 500 cells of the indicated cells lines were plated into individual wells of 6-well plates, and were treated overnight with either the FER inhibitor TL-2-59 (compound 8) or diluent (DMSO) then cells were treated with either 3 nM paclitaxel or diluent for 5 days before fixation and staining using coomassie blue. Bar plots represent the mean + s.e.m. of the number of colonies from at least three independent experiments. **(n)** Quantification analysis of the mouse body weight in the two xenograft models of ovarian cancer (OVCA432 and SKOV3ip1 ovarian cancer cells). Bar plots represent the mean + s.e.m.. **(o)** Representative images of FER immunohistochemical staining for SKOV3ip1 xenograft model that were treated with non-targeting (nt) siRNA or *FER*-targeting siRNA. Bar plots represent the mean + s.e.m. for the quantification analysis of FER protein staining.

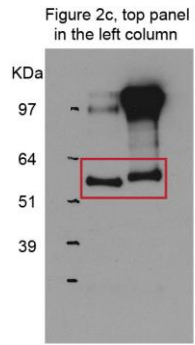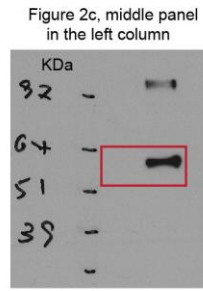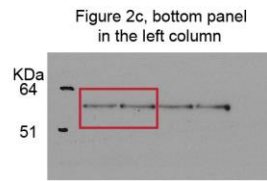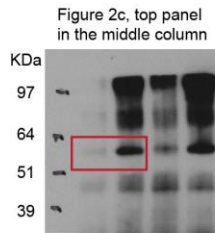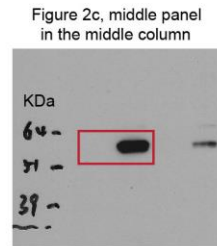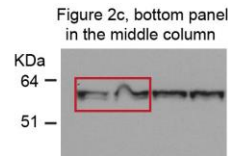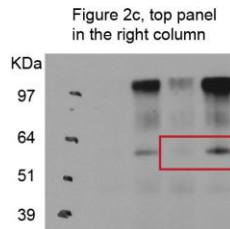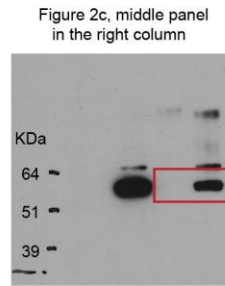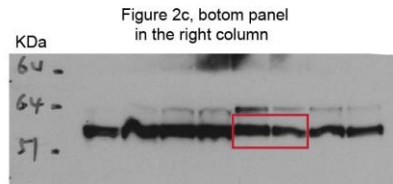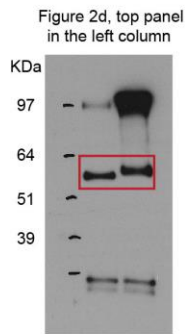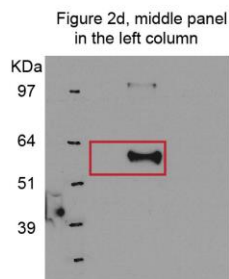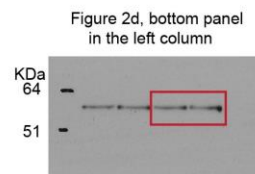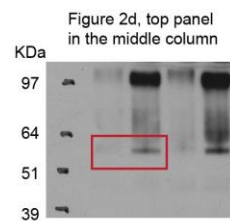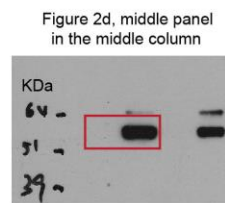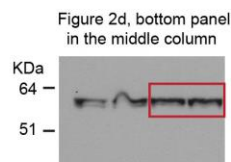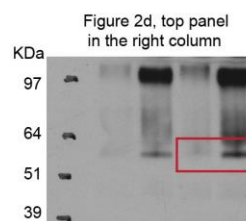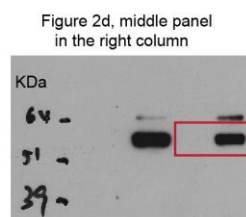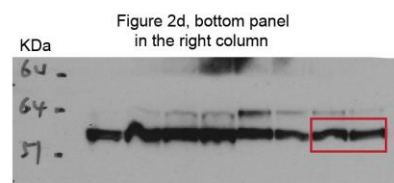

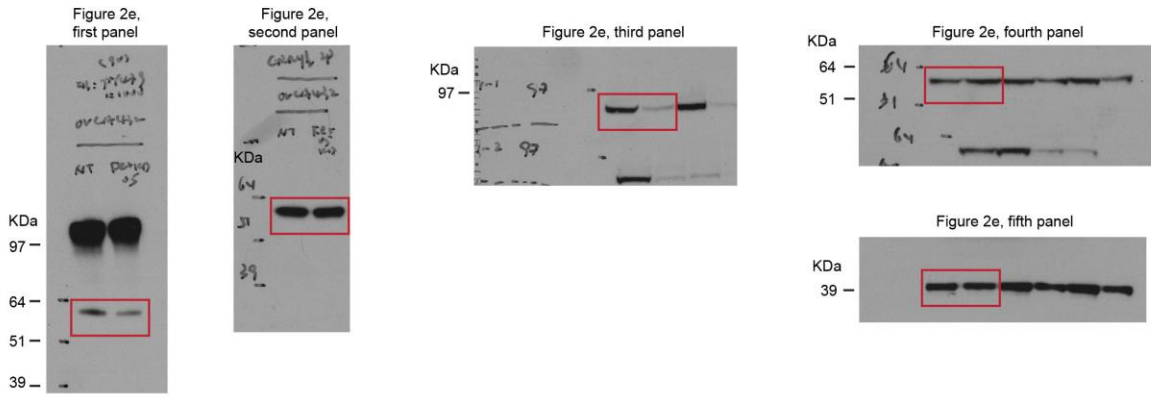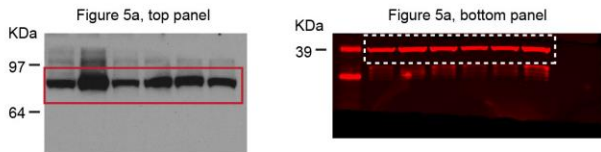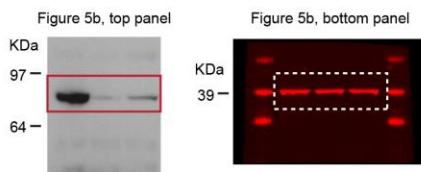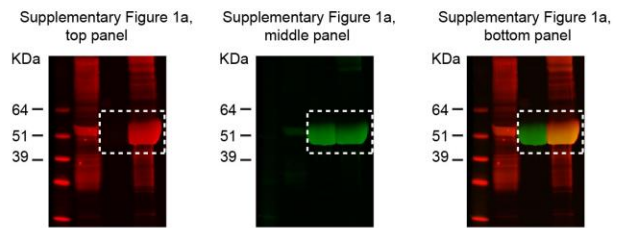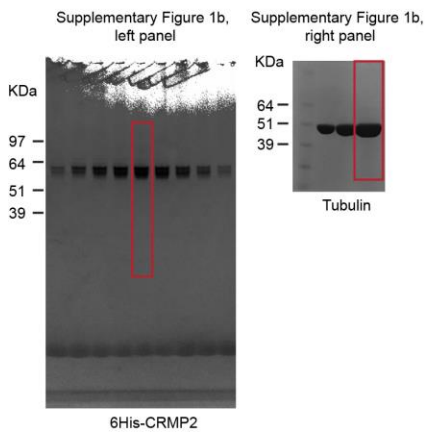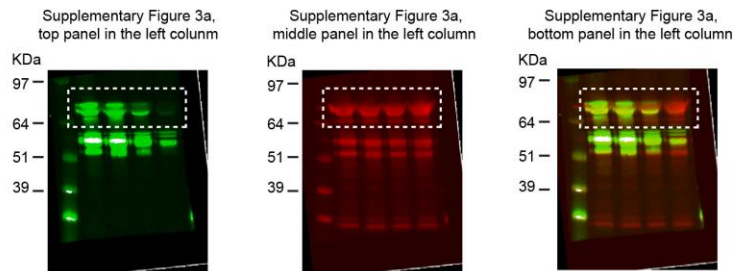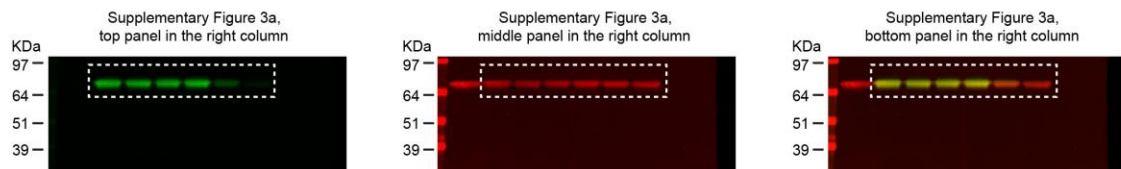

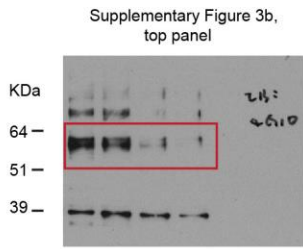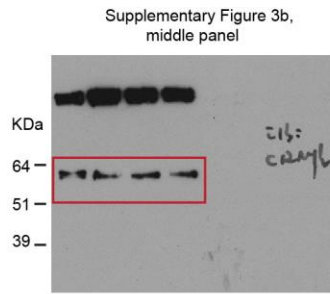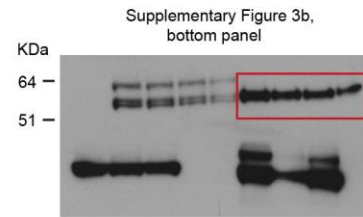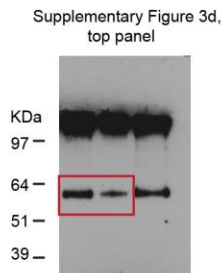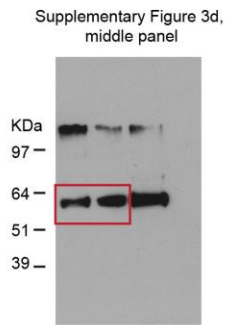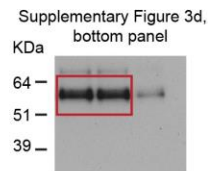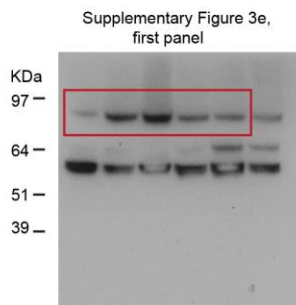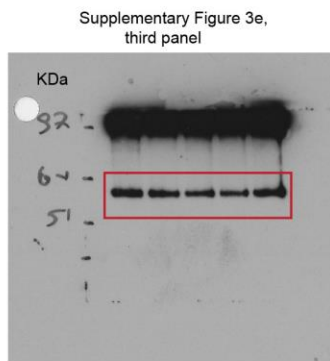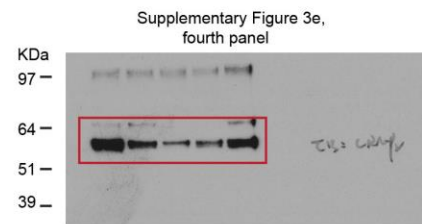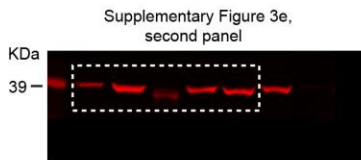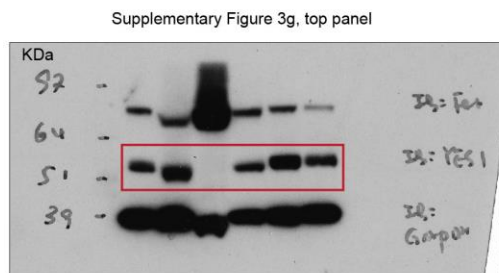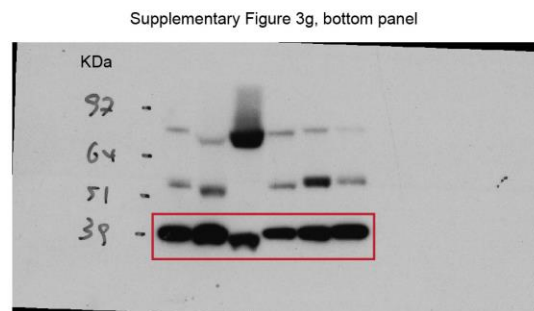



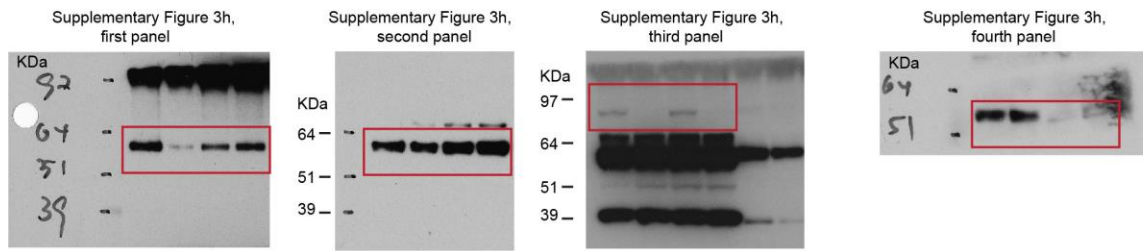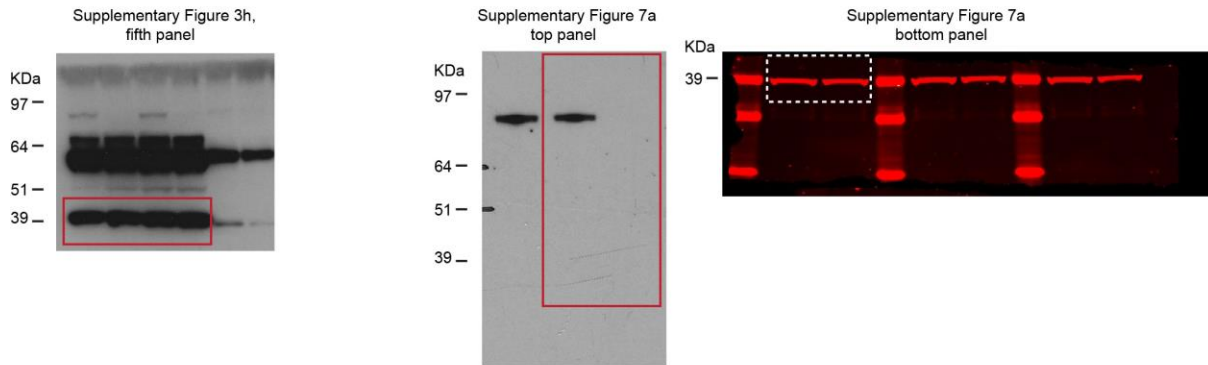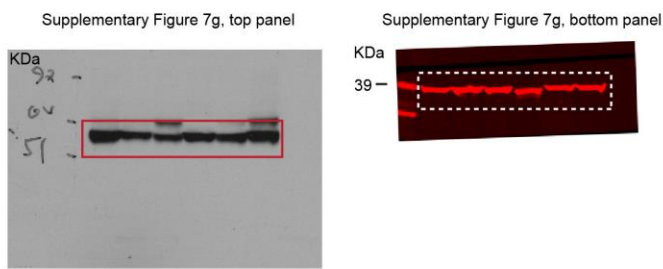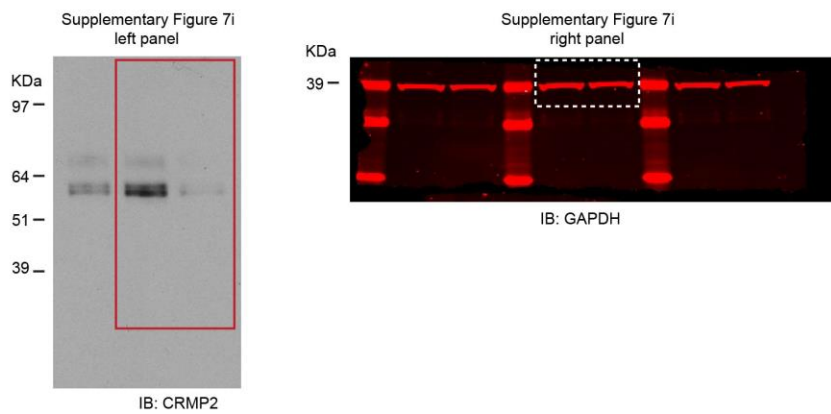

**Supplementary Figure 9.** Uncropped blots and gels used in the main and supplementary figures.

a

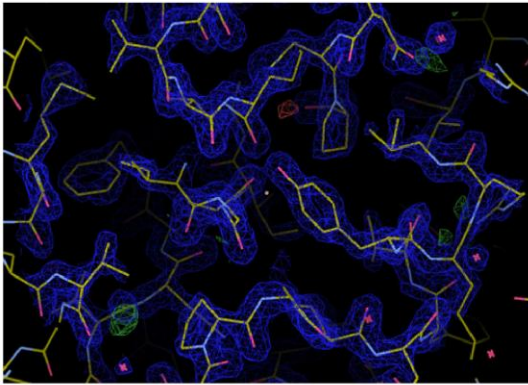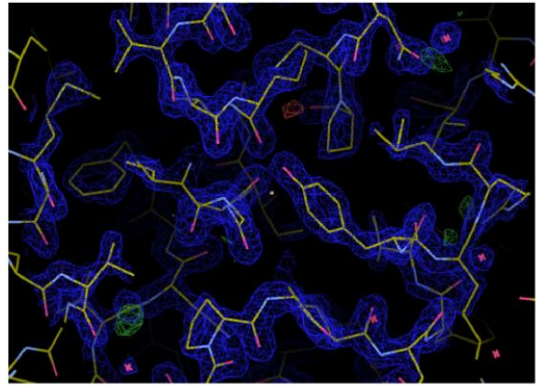

b

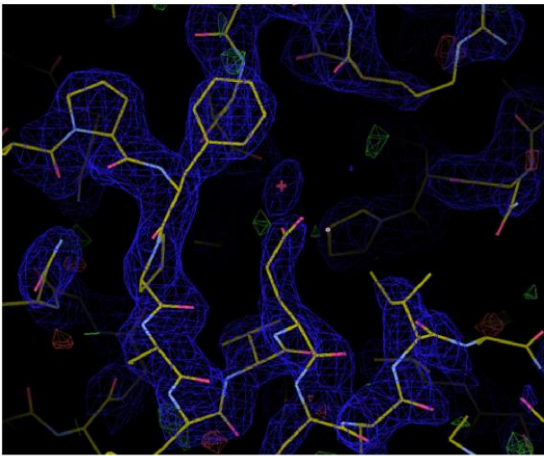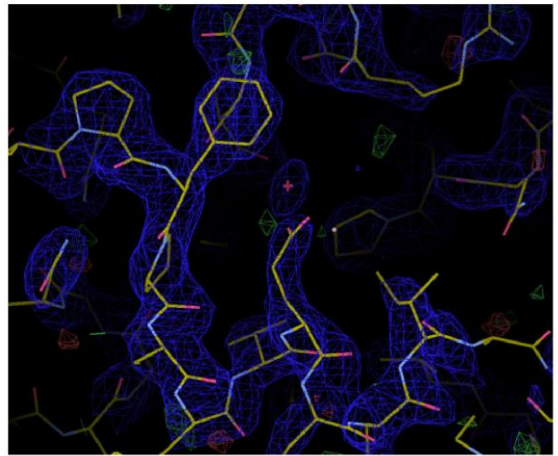

**Supplementary Figure 10.** A stereo image of a portion of the electron density map for crystallographic structure of CRMP2-WT (a) or CRMP2-2E (b).

**Supplementary Table 1.** Primers used for construction in this study are listed.

| Primer name | Description                                                                                                | Primer sequence (from 5' to 3')                                           |
|-------------|------------------------------------------------------------------------------------------------------------|---------------------------------------------------------------------------|
| CRMP2 1F    | primer used to clone CRMP2:pGEX-KG (residues 1-516) for GST-CRMP2 (residues 1-516) protein expression      | GTCCCGGGTATGTCTTATCAGGGGAAGAAAAATATT                                      |
| CRMP2 1R    | primer used to clone CRMP2:pGEX-KG (residues 1-516) for GST-CRMP2 (residues 1-516) protein expression      | GTTCTAGATCAGGCTGGAGTGACTGTCTT                                             |
| CRMP2 2F    | primer used to clone CRMP2:pNIC Bsa4 for 6His-CRMP2 protein expression                                     | TACTTCCAATCCATGATGTCTTATCAGGGGAAGAAA                                      |
| CRMP2 2R    | primer used to clone CRMP2:pNIC Bsa4 for 6His-CRMP2 protein expression                                     | TATCCACCTTTACTGCTAGCCCAGGCTGGTGATGTT                                      |
| CRMP2 3F    | primer used to clone CRMP2:pNIC Bsa4 (residues 13-516) for 6His-CRMP2 (residues 13-516) protein expression | TACTTCCAATCCATGACGAGCGATCGTCTTCTGAT                                       |
| CRMP2 3R    | primer used to clone CRMP2:pNIC Bsa4 (residues 13-516) for 6His-CRMP2 (residues 13-516) protein expression | TATCCACCTTTACTGTCAGGCTGGAGTGACTGTCTTGG                                    |
| CRMP2 4F    | primer used for CRMP2-Y479E mutation                                                                       | TTCCCTGATTTTGTGAAAAGCGTATCAAGGCA                                          |
| CRMP2 4R    | primer used for CRMP2-Y479E mutation                                                                       | TGCCTTGATACGCTTTTCAACAAAATCAGGGAA                                         |
| CRMP2 5F    | primer used for CRMP2-Y479F mutation                                                                       | TTCCCTGATTTTGTTC AAGCGTATCAAGGCA                                          |
| CRMP2 5R    | primer used for CRMP2-Y479F mutation                                                                       | TGCCTTGATACGCTTGAAAACAAAATCAGGGAA                                         |
| CRMP2 6F    | primer used for CRMP2-Y499E mutation                                                                       | CCTCGTGGCCTGGAGGACGGACCT                                                  |
| CRMP2 6R    | primer used for CRMP2-Y499E mutation                                                                       | AGGTCCGTCCTCCAGGCCACGAGG                                                  |
| CRMP2 7F    | primer used for CRMP2-Y499F mutation                                                                       | CCTCGTGGCCTGTTTGACGGACCT                                                  |
| CRMP2 7R    | primer used for CRMP2-Y499F mutation                                                                       | AGGTCCGTC A A CAGGCCACGAGG                                                |
| CRMP2 8F    | primer used for CRMP2-Y32F mutation                                                                        | TGACCAGTCGTTCTTGCAGACATATA                                                |
| CRMP2 8R    | primer used for CRMP2-Y32F mutation                                                                        | TATATGTCTGCAAAGAACGACTGGTCA                                               |
| CRMP2 9F    | primer used for CRMP2-Y251F mutation                                                                       | CAACTGCCCGCTGTTTATACCAAGGT                                                |
| CRMP2 9R    | primer used for CRMP2-Y251F mutation                                                                       | ACCTTGGTGATAAACAGCGGGCAGTTG                                               |
| CRMP2 10F   | primer used for CRMP2-Y275F mutation                                                                       | GGGAACTGTGGTGTGGCGAGCCCAT                                                 |
| CRMP2 10R   | primer used for CRMP2-Y275F mutation                                                                       | ATGGGCTCGCCAAACACCACAGTTCCC                                               |
| CRMP2 11F   | primer used for CRMP2-Y431F mutation                                                                       | CAGCTCTCTCGAGTTCAACATCTTTGA                                               |
| CRMP2 11R   | primer used for CRMP2-Y431F mutation                                                                       | TCAAAGATGTTGAACTCGAGAGAGCTG                                               |
| CRMP2 12 F  | primer used to clone CRMP2:pLX302                                                                          | GGGGACAAGTTTGTACAAAAAAGCAGGCTTCAAGGAGATAGAACC<br>ATGTCTTATCAGGGGAAGAAAAAT |
| CRMP2 12 R  | primer used to clone CRMP2:pLX302                                                                          | GGGGACCACTTTGTACAAGAAAGCTGGGTCGCCAGGCTGGTGATG<br>TTGGC                    |

**Supplementary Table 2.** The primer sequences for qPCR are listed.

| Primer name     | Description                         | Primer sequence (from 5' to 3') |
|-----------------|-------------------------------------|---------------------------------|
| FES 1F (qPCR)   | to determine human FES mRNA level   | TCAAGGCCAAGTTTCTACAGG           |
| FES 1R (qPCR)   | to determine human FES mRNA level   | GAGGAAGGTCAGGAAGTCG             |
| FER 1F (qPCR)   | to determine human FER mRNA level   | TGTCTCGTCAAGAGGATGGTG           |
| FER 1R (qPCR)   | to determine human FER mRNA level   | CAAACCCCTAAGCTGAAGGTC           |
| GAPDH 1F (qPCR) | to determine human GAPDH mRNA level | GCAAATTCCATGGCACCG              |
| GAPDH 1R (qPCR) | to determine human GAPDH mRNA level | TCGCCCACTTGATTTTGG              |

**Supplementary Table 3.** Shown are the information and dilutions of commercial primary antibodies used in this study. WB, western blot; IF, immunofluorescence staining; IP, immunoprecipitation; IHC, immunohistochemistry.

| <b>Antibodies</b>                                                      | <b>SOURCE</b>  | <b>Catalogue number</b> |
|------------------------------------------------------------------------|----------------|-------------------------|
| Mouse anti- $\alpha$ -tubulin<br>(IF, 1:200)                           | Sigma-Aldrich  | Cat# T5168              |
| Rabbit anti-CRMP2<br>(IF, 1:200; IHC, 1:200; IP, 1:100;<br>WB, 1:3000) | Abcam          | Cat# ab129082           |
| Rabbit anti-detyrosinated tubulin<br>(Glu-tubulin)<br>(IF, 1:100)      | Millipore      | Cat# AB3201             |
| Mouse anti-FER<br>(IHC, 1:300)                                         | Abcam          | Cat# ab130199           |
| Rabbit anti-FER<br>(WB, 1:5000)                                        | Abcam          | Cat# ab52479            |
| Rabbit anti-YES<br>(WB, 1:1000)                                        | Abcam          | Cat# ab133314           |
| Mouse anti-GAPDH<br>(WB, 1:5000)                                       | Proteintech    | Cat# 60004-1            |
| Mouse anti-GST<br>(WB, 1:5000)                                         | Cell Signaling | Cat# 2624S              |
| Mouse anti-His<br>(WB, 1:2000)                                         | Cell Signaling | Cat# 2366S              |
| Mouse anti-Phosphotyrosine (4G10)<br>(WB, 1:1000)                      | Millipore      | Cat# 05-321             |
| Rabbit anti-V5<br>(IF, 1:200)                                          | Abcam          | Cat# ab9116             |

**Supplementary Table 4.** The data collection and refinement statistics for protein structure determination.

|                                    | CRMP2 (residues 13-516)<br>(PDB ID 5MKV) | CRMP2 (residues 13-516)-<br>2E mutant<br>(PDB ID 5MLE) |
|------------------------------------|------------------------------------------|--------------------------------------------------------|
| Wavelength (Å)                     | 0.92                                     | 0.92                                                   |
| Resolution range (Å)               | 19.87 - 1.8 (1.86 - 1.8)                 | 83.98 - 2.48 (2.56 - 2.48)                             |
| Space group                        | P 1 21 1                                 | C 2 2 21                                               |
| Unit cell dimensions               | 79.90 157.51 87.42<br>90 93.61 90        | 70.90 185.82 196.31<br>90 90 90                        |
| Total reflections                  | 695101 (69999)                           | 313582 (31996)                                         |
| Unique reflections                 | 194435 (19419)                           | 46370 (4564)                                           |
| Multiplicity                       | 3.6 (3.6)                                | 6.8 (7.0)                                              |
| Completeness (%)                   | 97.7 (97.8)                              | 99.9 (99.9)                                            |
| Mean I/sigma(I)                    | 15.8 (3.0)                               | 6.2 (1.0)                                              |
| Wilson B-factor (Å <sup>2</sup> )  | 21.9                                     | 36.1                                                   |
| R-merge                            | 0.051 (0.372)                            | 0.319 (1.826)                                          |
| R-meas                             | 0.060 (0.436)                            | 0.345 (1.973)                                          |
| R-pim                              | 0.031 (0.227)                            | 0.132 (0.742)                                          |
| CC1/2 (%)                          | 99.0 (87.0)                              | 98.0 (57.0)                                            |
| Reflections used in refinement     | 194312 (19419)                           | 46359 (4564)                                           |
| Reflections used for R-free        | 9714 (971)                               | 2328 (231)                                             |
| R-work (%)                         | 17.35 (22.89)                            | 21.60 (36.14)                                          |
| R-free (%)                         | 20.31 (27.48)                            | 25.54 (38.84)                                          |
| CC (work)                          | 0.96 (0.80)                              | 0.92 (0.50)                                            |
| CC (free)                          | 0.94 (0.76)                              | 0.87 (0.33)                                            |
| Number of non-hydrogen atoms       | 15644                                    | 7459                                                   |
| macromolecules                     | 14960                                    | 7221                                                   |
| ligands                            | 88                                       | 63                                                     |
| solvent                            | 596                                      | 175                                                    |
| Protein residues                   | 1949                                     | 940                                                    |
| RMS (bonds) (Å)                    | 0.020                                    | 0.014                                                  |
| RMS (angles) (°)                   | 1.9                                      | 1.6                                                    |
| Ramachandran favored (%)           | 96.85                                    | 95.07                                                  |
| Ramachandran allowed (%)           | 2.99                                     | 4.28                                                   |
| Ramachandran outliers (%)          | 0.15                                     | 0.64                                                   |
| Rotamer outliers (%)               | 1.6                                      | 4.83                                                   |
| Molprobrity Clashscore             | 3.88                                     | 3.11                                                   |
| Molprobrity Percentile             | 98 <sup>th</sup>                         | 100 <sup>th</sup>                                      |
| Average B-factor (Å <sup>2</sup> ) | 25.55                                    | 40.72                                                  |
| macromolecules                     | 25.45                                    | 40.68                                                  |
| ligands                            | 41.81                                    | 70.05                                                  |
| solvent                            | 25.69                                    | 31.83                                                  |
