# Supplementary material for: Tuning microtubule dynamics to enhance cancer therapy by modulating FER-mediated CRMP2 phosphorylation
Source: PubMed Central journal article supplement (PMC5797184; doi:10.1038/s41467-017-02811-7), 2018-02-02
Supplement: 41467_2017_2811_MOESM3_ESM.pdf [file 41467_2017_2811_MOESM3_ESM.pdf]

## **Description of Additional Supplementary Files**

File Name: Supplementary Movie 1

Description: Time series movie of microtubule elongation, related to the top panel of Supplementary Figure 1d.

File Name: Supplementary Movie 2

Description: Time series movie of microtubule elongation in the presence of CRMP2, related to the middle panel of Supplementary Figure 1d.

File Name: Supplementary Movie 3

Description: Time series movie of microtubule elongation in the presence of pCRMP2 (phospho-CRMP2), related to the bottom panel of Supplementary Figure 1d.
